# Supplementary material
Source: publisher figshare collection journal article supplement (https://plos.figshare.com/articles/dataset/_/10293983)
Supplement: Supplementary file [file 1]

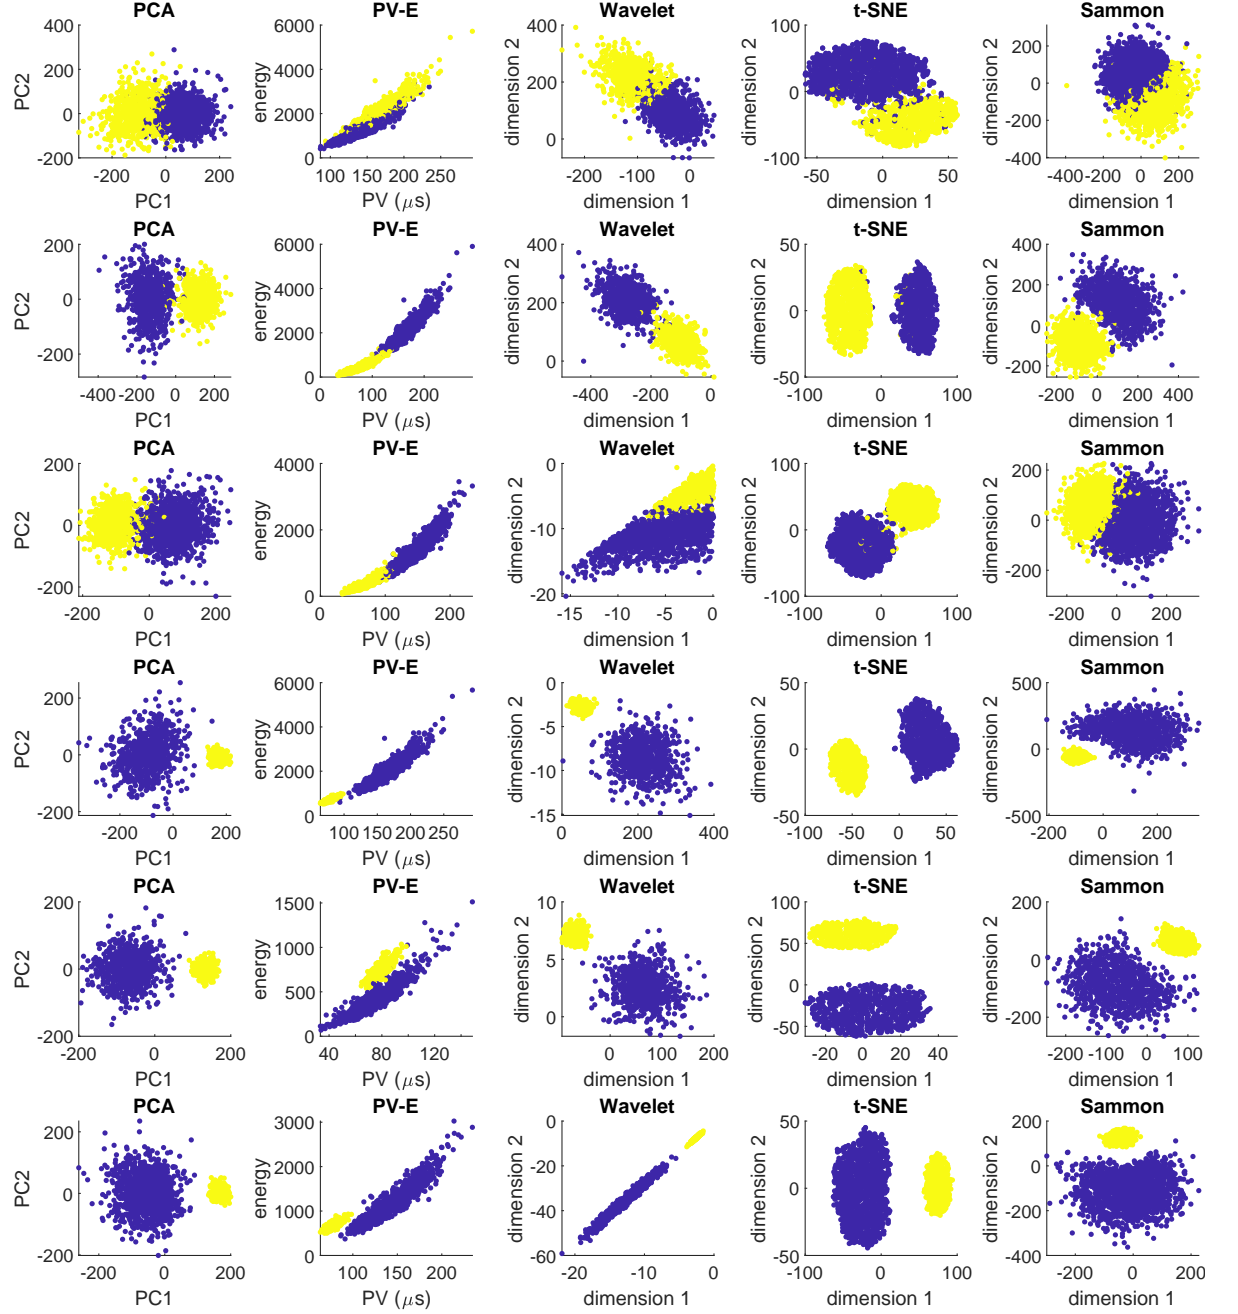

(a) Reproducing the projections in Figure 9 with labeled axis. Rows represent subfigures 9a to 9f

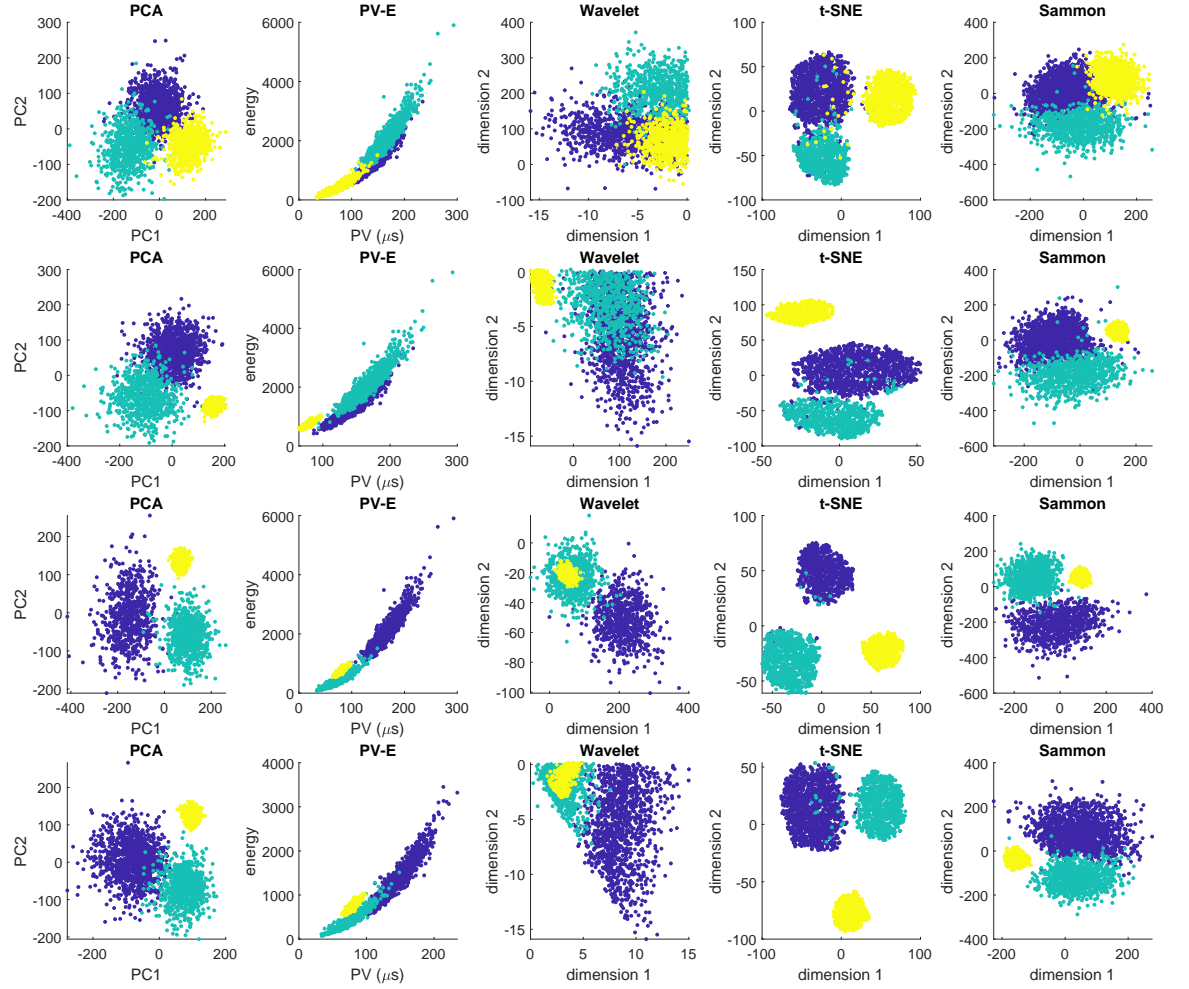

(b) Reproducing the projections in Figure 10 with labeled axis. Rows represent subfigures 10a to 10d

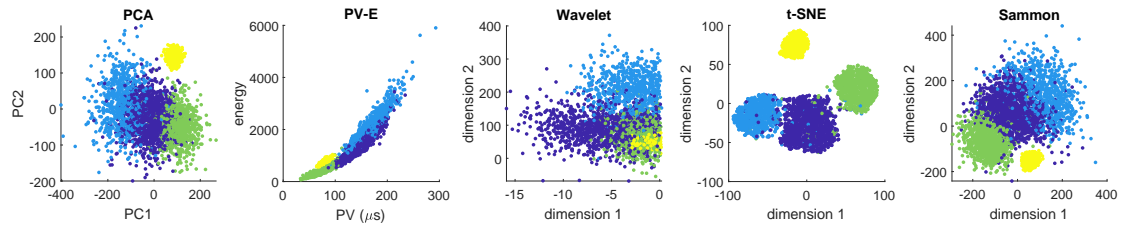

(c) Reproducing the projections in Figure 11 with labeled axis
