# Supplementary material
Source: publisher figshare collection journal article supplement (https://plos.figshare.com/articles/dataset/_/10293983)
Supplement: Supplementary file [file 1]

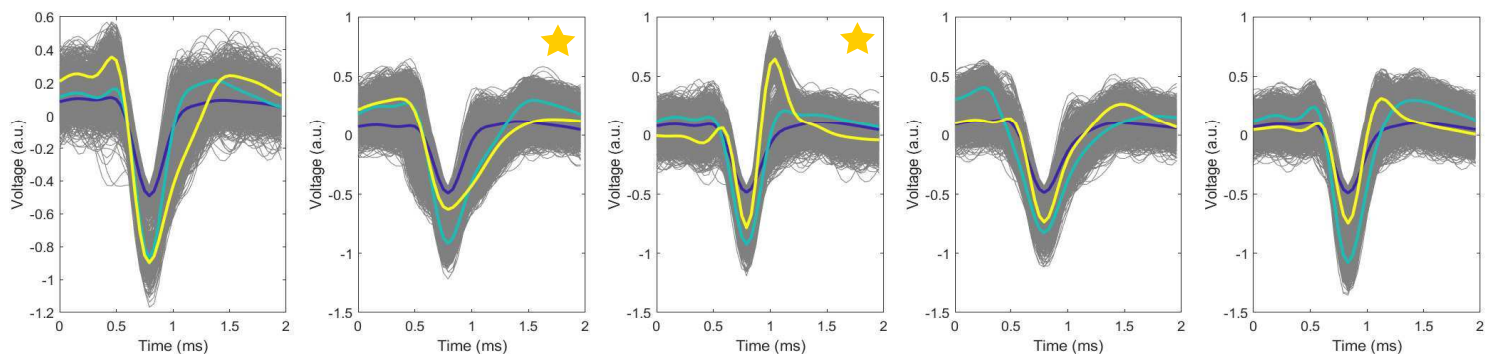

(a) Five mixtures of spikes, each including 3 subsets of spikes.

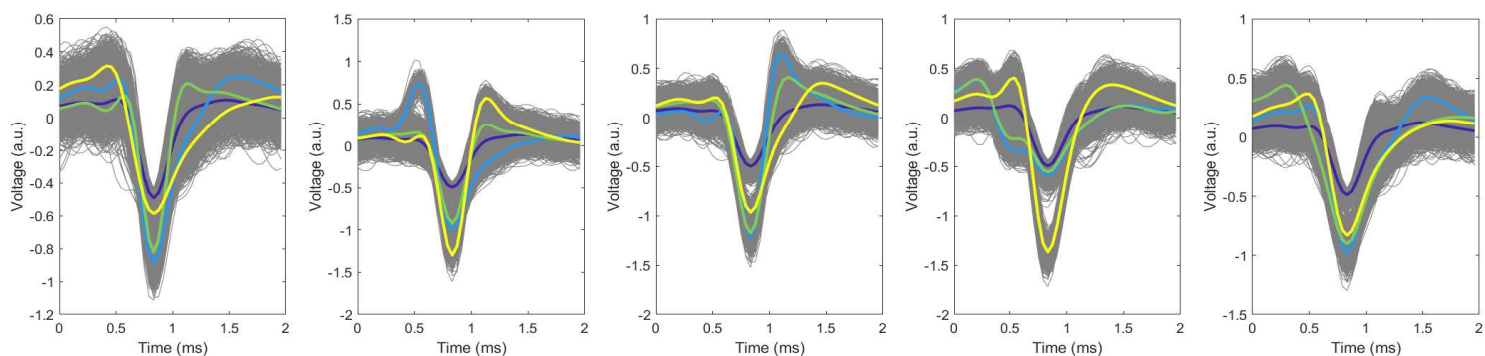

(b) Five mixtures of spikes, each including 4 subsets of spikes.

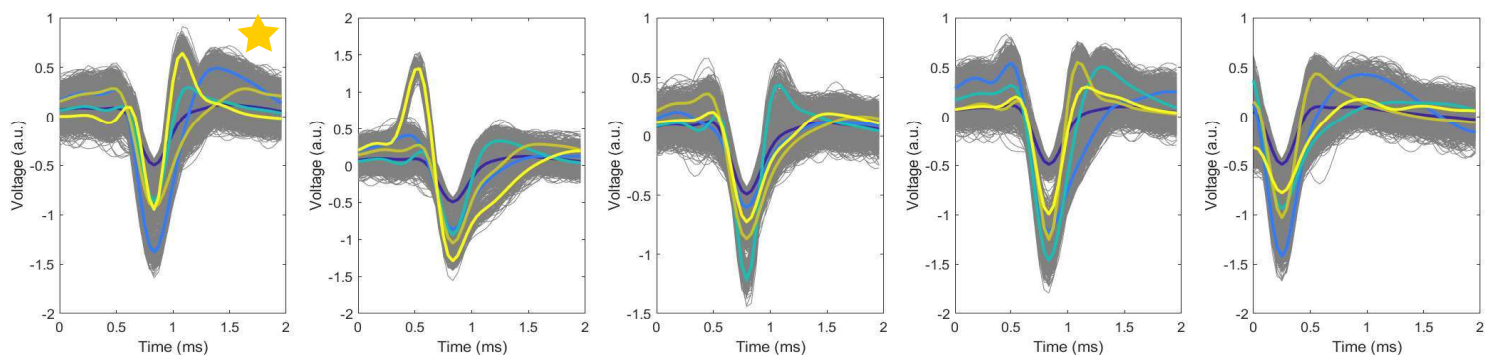

(c) Five mixtures of spikes, each including 5 subsets of spikes.

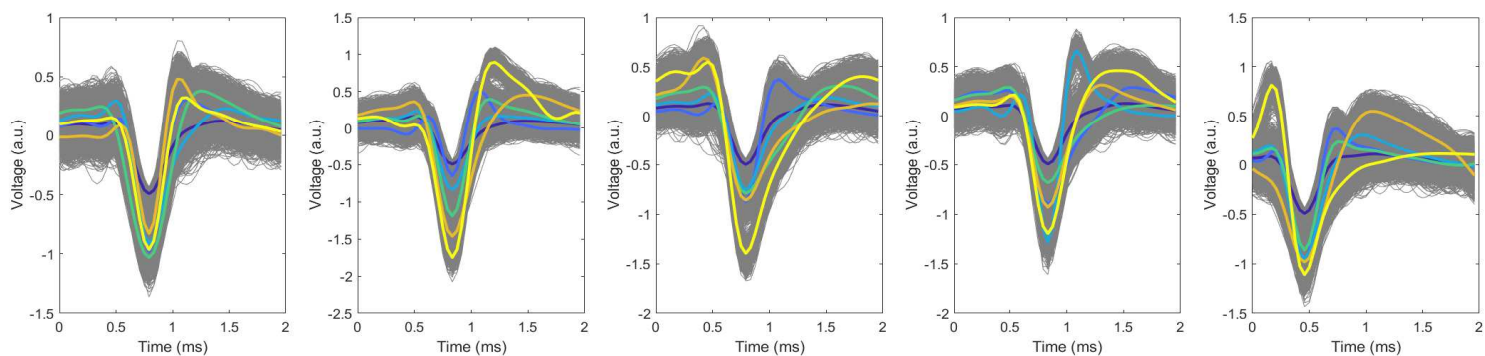

(d) Five mixtures of spikes, each including 6 subsets of spikes.

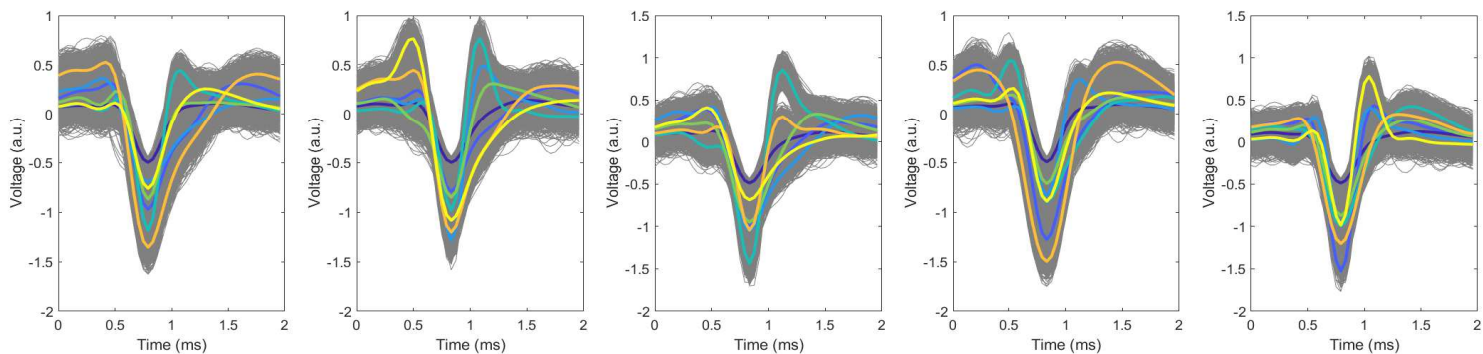

(e) Five mixtures of spikes, each including 7 subsets of spikes.

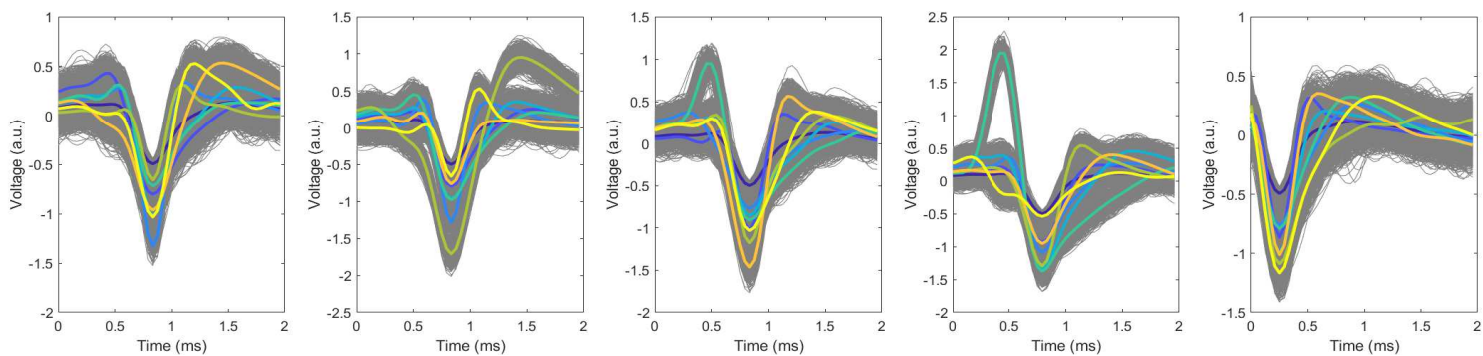

(f) Five mixtures of spikes, each including 8 subsets of spikes.

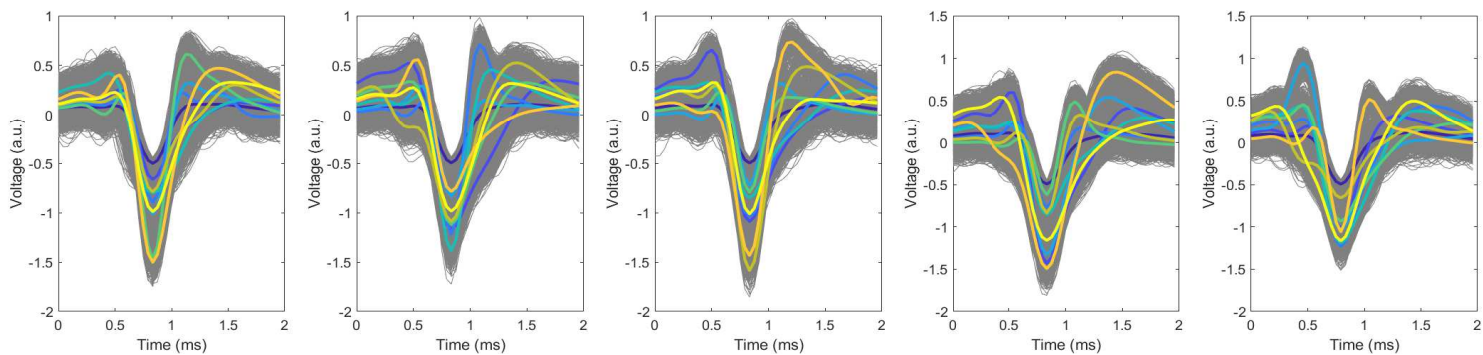

(g) Five mixtures of spikes, each including 9 subsets of spikes.

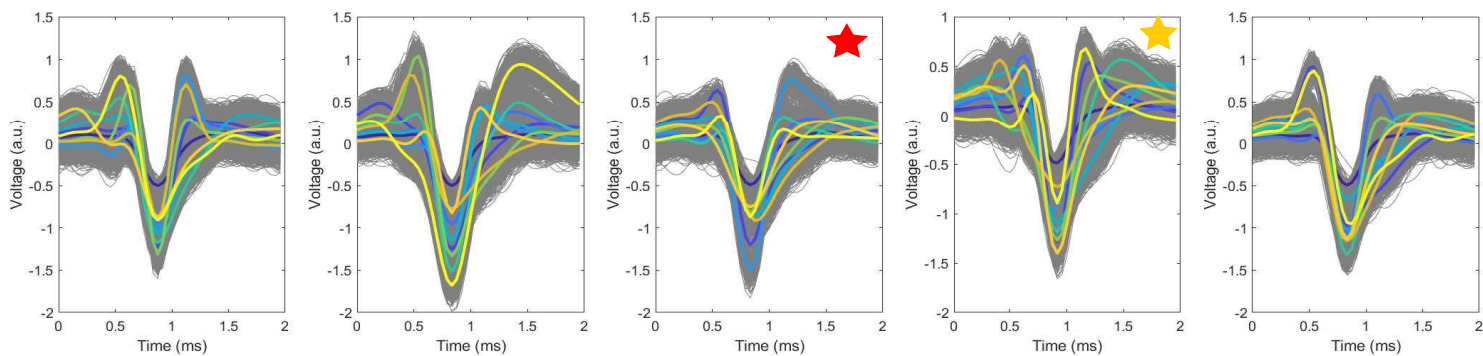

(h) Five mixtures of spikes, each including 10 subsets of spikes.



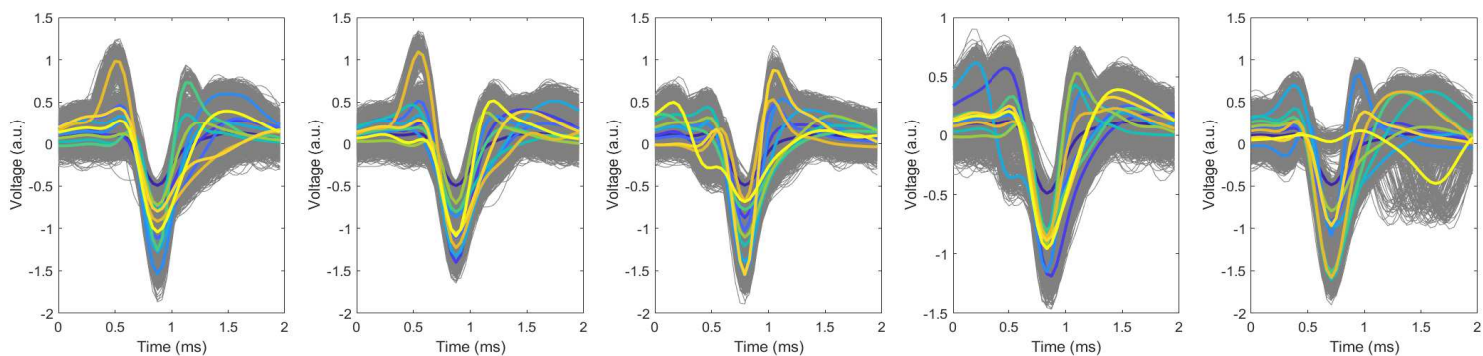

(i) Five mixtures of spikes, each including 11 subsets of spikes.

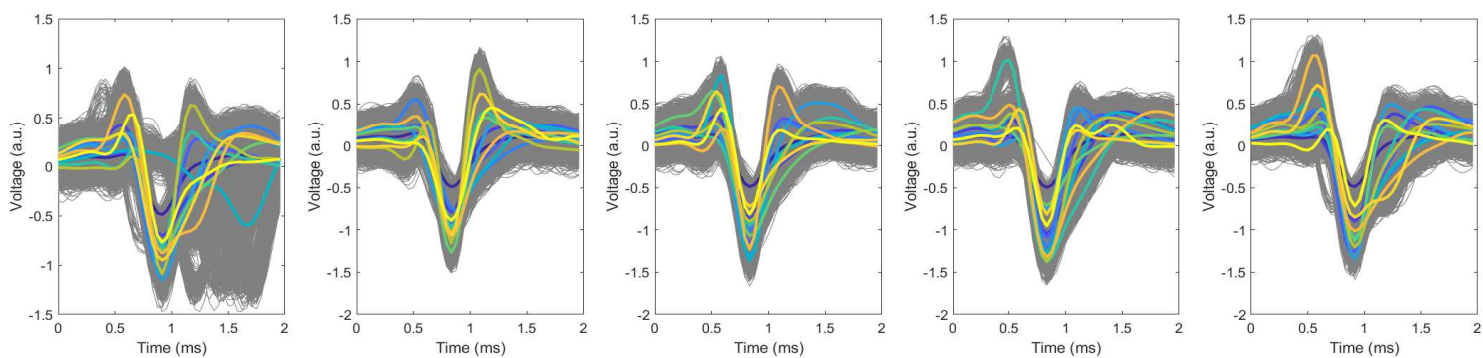

(j) Five mixtures of spikes, each including 12 subsets of spikes.

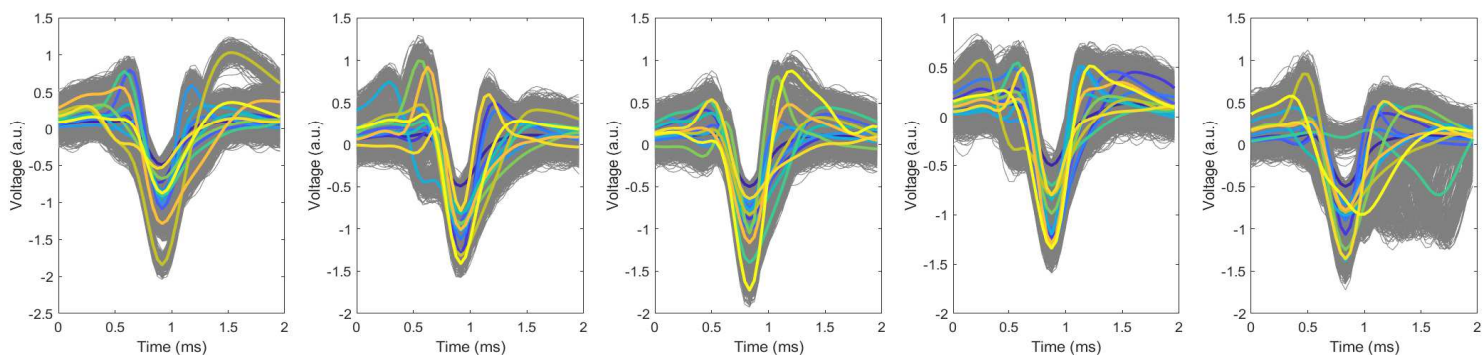

(k) Five mixtures of spikes, each including 13 subsets of spikes.

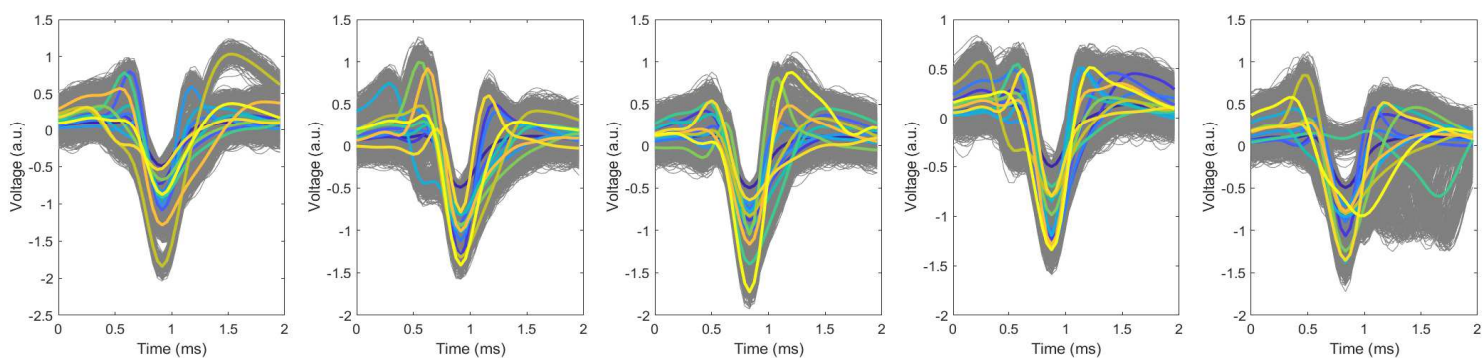

(l) Five mixtures of spikes, each including 14 subsets of spikes.

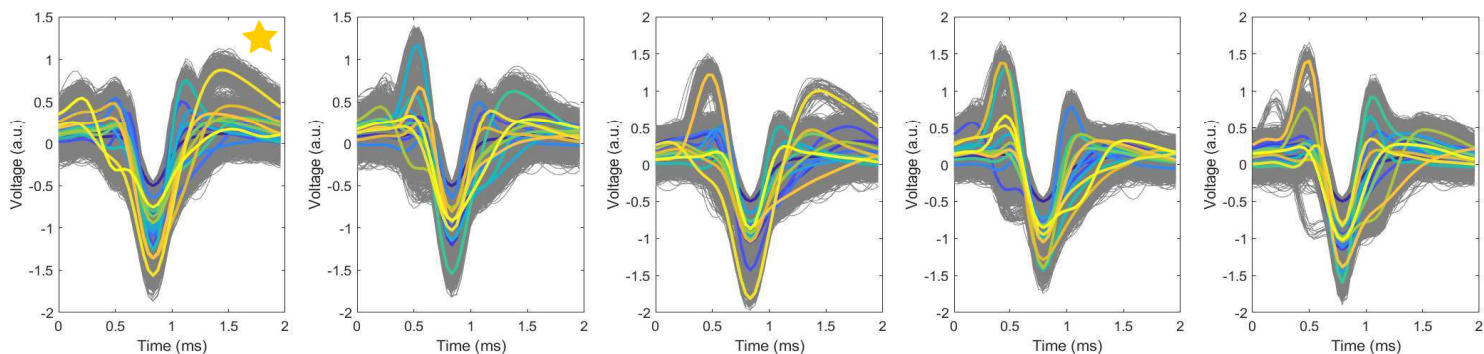

(m) Five mixtures of spikes, each including 15 subsets of spikes.

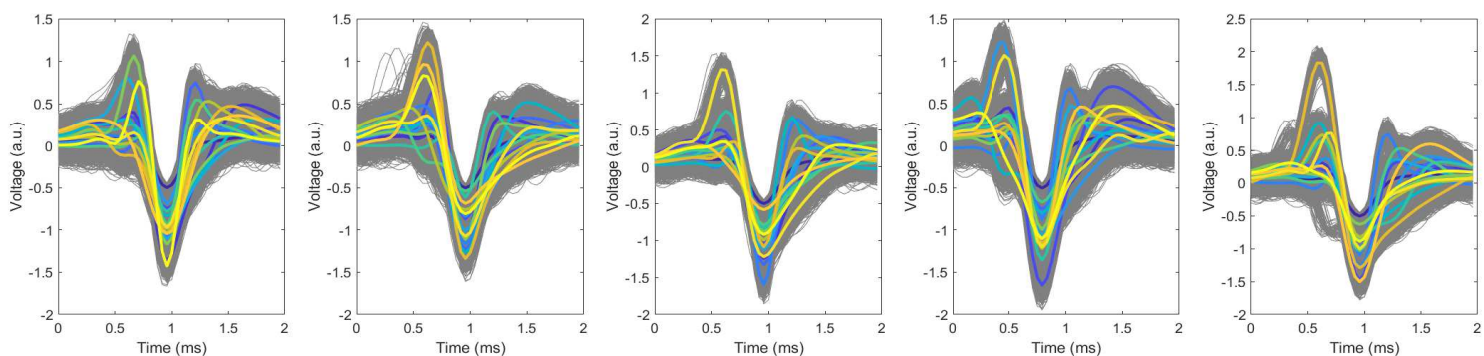

(n) Five mixtures of spikes, each including 16 subsets of spikes.

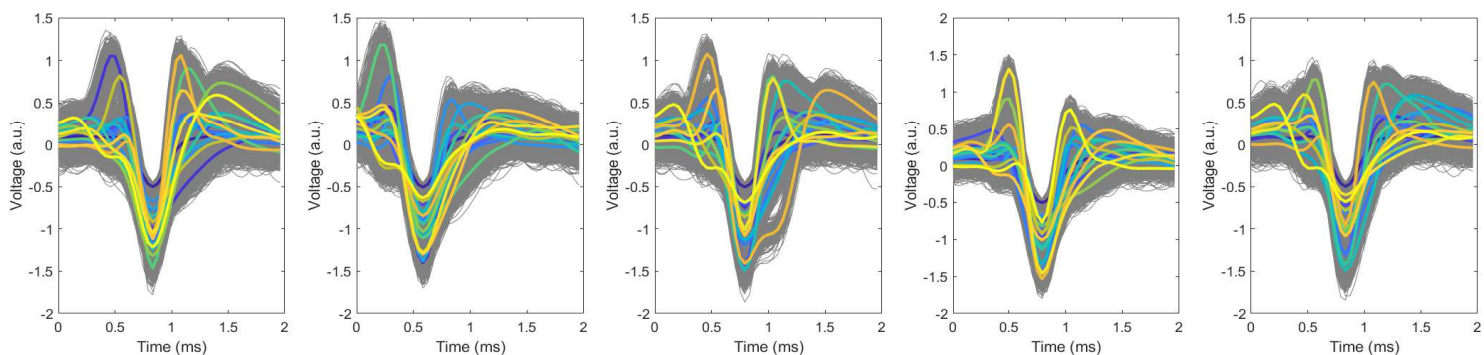

(o) Five mixtures of spikes, each including 17 subsets of spikes.

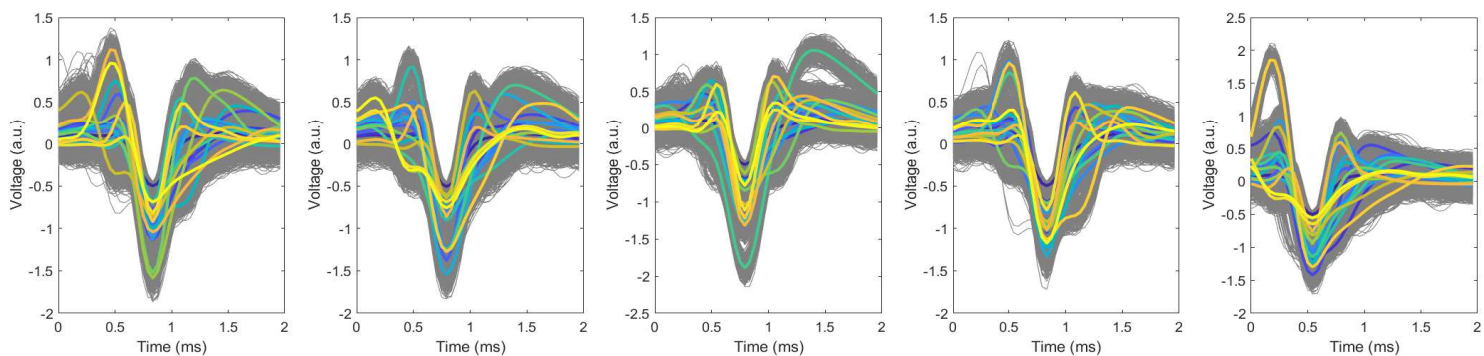

(p) Five mixtures of spikes, each including 18 subsets of spikes.

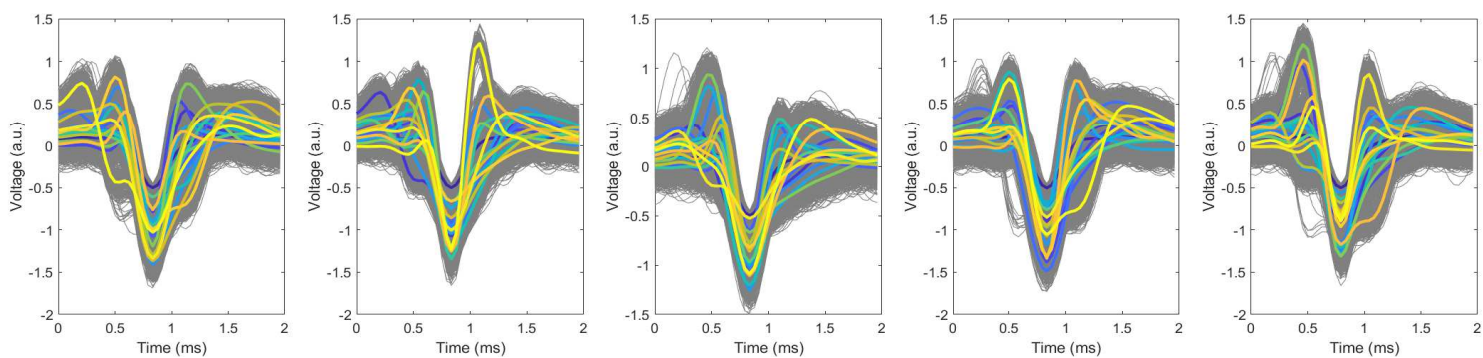

(q) Five mixtures of spikes, each including 19 subsets of spikes.

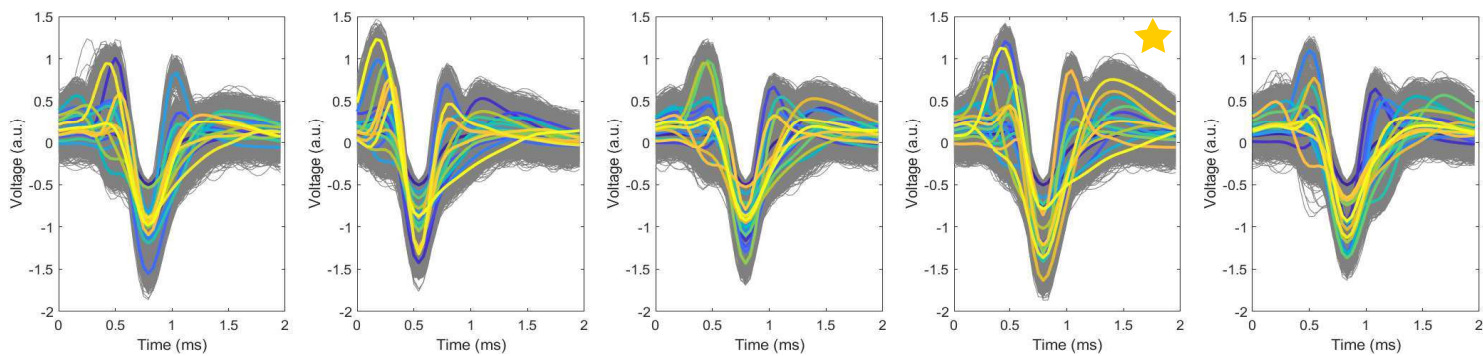

(r) Five mixtures of spikes, each including 20 subsets of spikes.
