# Supplementary material
Source: publisher figshare collection journal article supplement (https://plos.figshare.com/articles/dataset/_/10293983)
Supplement: Supplementary file [file 1]

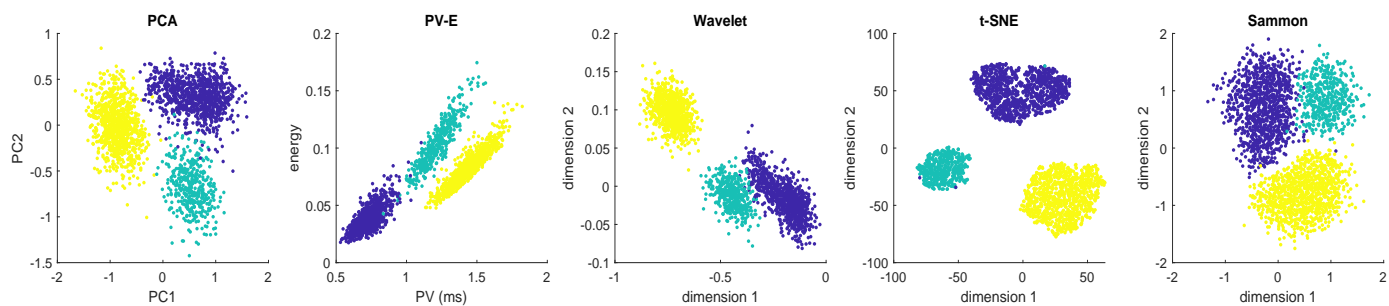

(a) Same projections as shown in Figure 1-a with axes labels

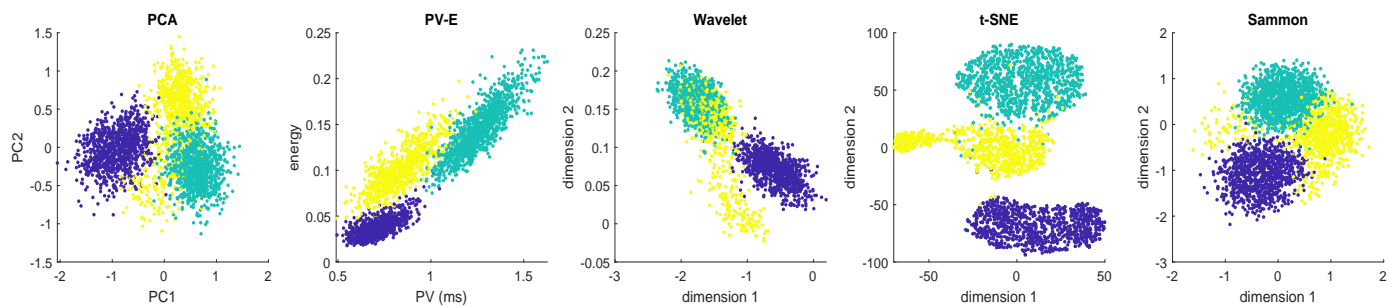

(b) Same projections as shown in Figure 1-b with axes labels

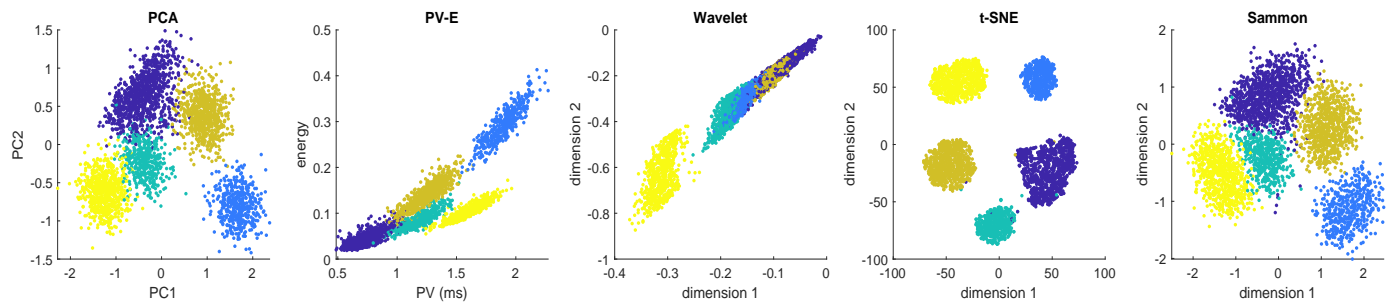

(c) Same projections as shown in Figure 2 with axes labels

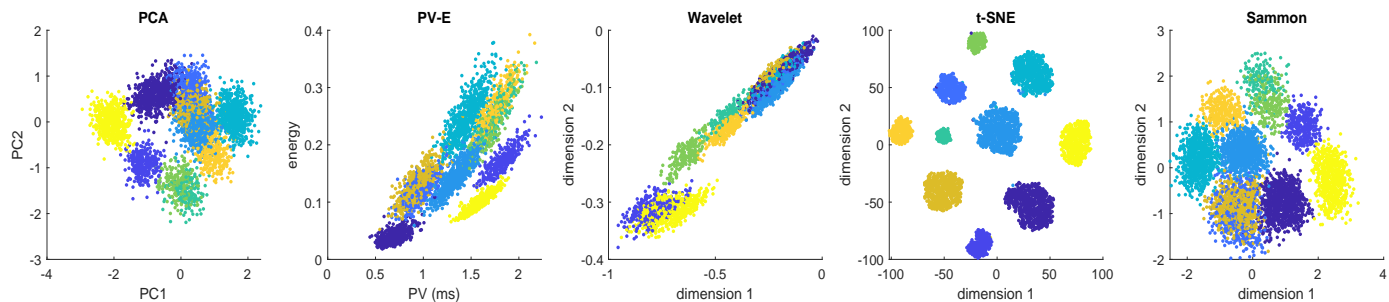

(d) Same projections as shown in Figure 3 with axes labels

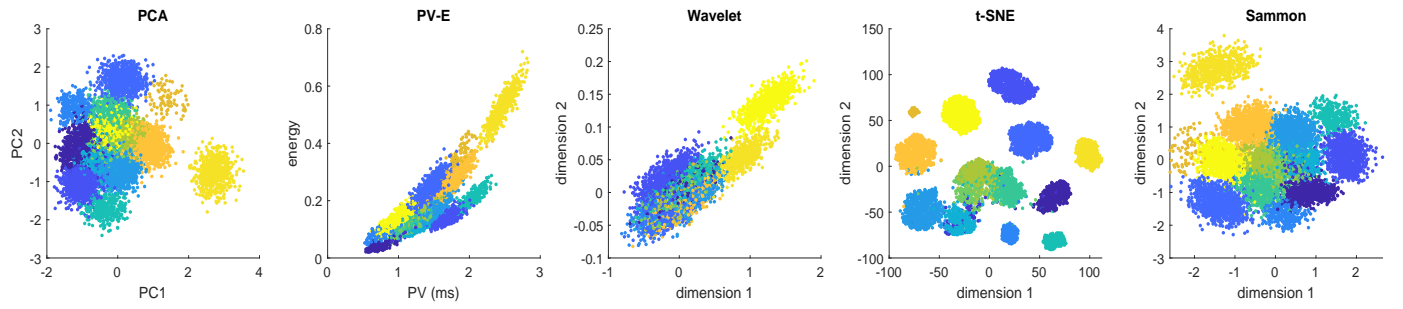

(e) Same projections as shown in Figure 4 with axes labels

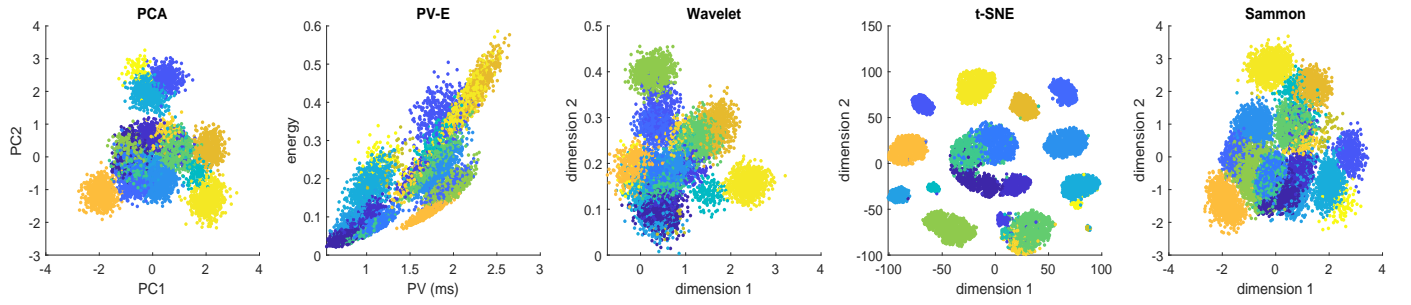

(f) Same projections as shown in Figure 5 with axes labels
