# Supplementary material
Source: publisher figshare collection journal article supplement (https://plos.figshare.com/articles/dataset/_/10293983)
Supplement: Supplementary file [file 1]

### Algorithm: VAT

|    |                                            |                                                                                                              |
|----|--------------------------------------------|--------------------------------------------------------------------------------------------------------------|
| 1  | <b>In</b>                                  | D, $n \times n$ matrix of dissimilarities: $D = D^T$ ; $d_{ij} \geq 0 \forall i, j$ ; $d_{ii} = 0 \forall i$ |
| 2  | <b>Set</b>                                 | $K = \{1, 2, \dots, n\}$ ; $I = J = \emptyset$ :                                                             |
| 3  |                                            | Select $(i, j) \in \arg \max \{D_{st} : s \in K, t \in K\}$                                                  |
| 4  |                                            | $P(1) = i$ ; $I = \{i\}$ ; $j = K - \{i\}$                                                                   |
| 5  |                                            | % Initialize MST at either end of edge with largest weight in D                                              |
| 6  | <b>For</b> $m = 2, \dots, n$ <b>do:</b>    | select $(i, j) \in \arg \min \{D_{st} : s \in I, t \in J\}$                                                  |
| 7  |                                            | Select $(i, j) \in \arg \min \{D_{st} : s \in I, t \in J\}$                                                  |
| 8  |                                            | $P(m) = j$ ; $I = I \cup \{j\}$ ; $J = J - \{j\}$ ; $d_{m-1} = d_{ij}$                                       |
| 9  | <b>For</b> $1 \leq i, j \leq n$ <b>do:</b> |                                                                                                              |
| 10 |                                            | $[D^*]_{ij} = [D]_{P(i)P(j)}$                                                                                |
| 11 | <b>Out</b>                                 | VAT reordered dissimilarities $D^*$ : arrays P, d                                                            |
| 12 |                                            | % Create VAT RDI $I(D^*)$ using $D^*$                                                                        |

### Algorithm: iVAT

|    |                                             |                                                                                |
|----|---------------------------------------------|--------------------------------------------------------------------------------|
| 13 | <b>In</b>                                   | $D^* = \text{VAT reordered dissimilarity matrix}$ : $D^* = [0]$                |
| 14 | <b>For</b> $k = 2$ <b>to</b> $n$ <b>do:</b> |                                                                                |
| 15 |                                             | $j = \arg \min_{r=1, \dots, k-1} \{D_{kr}^*\}$                                 |
| 16 |                                             | $D_{kc}^* = D_{kc}^*$ ; $c = j$                                                |
| 17 |                                             | $D_{kc}^* = \max \{D_{kj}^*, D_{jc}^*\}$ ; $c = 1, \dots, k-1$ ; $c \neq j$    |
| 18 |                                             |                                                                                |
| 19 | <b>For</b> $j = 2, \dots, n$ ; $i \neq j$ : |                                                                                |
| 20 |                                             | $D_{ji}^* = D_{ij}^*$                                                          |
|    | <b>Out</b>                                  | iVAT Reordered dissimilarities $D^*$<br>% Create iVAT RDI $I(D^*)$ using $D^*$ |
